# Supplementary material for: An atlas of late prenatal human neurodevelopment resolved by single-nucleus transcriptomics
Source: PubMed Central journal article supplement (PMC9744747; doi:10.1038/s41467-022-34975-2), 2022-12-12
Supplement: 41467_2022_34975_MOESM3_ESM.pdf [file 41467_2022_34975_MOESM3_ESM.pdf]

## Description of Additional Supplementary Files

File Name: Supplementary Data 1

Description: Determination of prenatal gestational age in samples

File Name: Supplementary Data 2

Description: Stratification of samples by sex and distinct gestational stages

File Name: Supplementary Data 3-5

Description: Cell Ranger sequencing metrics of per stage snRNA-seq data

File Name: Supplementary Data 6

Description: Top 50 cluster-defining genes for all integrated data cluster analyses identified by two-sided Wilcoxon Rank Sum testing (p-adj. > 0.05; average log<sub>2</sub>(fold change) > 0.5 or < -0.5).

File Name: Supplementary Data 7

Description: Differential gene expression analyses of germinal matrix cell types identified by two-sided Wilcoxon Rank Sum testing (p-adj. > 0.05; average log<sub>2</sub>(fold change) > 0.5 or < -0.5).

File Name: Supplementary Data 8

Description: Gene set enrichment analysis of top 100 differential mIPC markers performed using hypergeometric testing with Benjamini-Hochberg correction (p-adj. < 0.05).

File Name: Supplementary Data 9

Description: Gene set enrichment analysis of top 100 differential gIPC markers performed using hypergeometric testing with Benjamini-Hochberg correction (p-adj. < 0.05).

File Name: Supplementary Data 10

Description: Gene set enrichment analysis of top 100 differential gIPC-O markers performed using hypergeometric testing with Benjamini-Hochberg correction (p-adj. < 0.05).

File Name: Supplementary Data 11

Description: Gene set enrichment analysis of top 100 differential gIPC-A markers performed using hypergeometric testing with Benjamini-Hochberg correction (p-adj. < 0.05).
